# Supplementary material for: Luminescence on–off switching via reversible interconversion between inter- and intramolecular aurophilic interactions
Source: Royal Society of Chemistry journal article supplement (doi:10.1039/c1cc14351d), 2011-01-01

## Supplementary Information

### Luminescence on-Off switching via reversible interconversion between inter- and intramolecular aurophilic interactions

Semi Han,<sup>a</sup> Yu Young Yoon,<sup>a</sup> Ok-Sang Jung<sup>b</sup> and Young-A Lee<sup>\*a</sup>

<sup>a</sup> *Department of Chemistry and Research Institute of Physics and Chemistry, Chonbuk National University, Jeonju 561-756, Korea. Fax: +82 63 270 3408; Tel: +82 63 270 3347; E-mail: ylee@jbnu.ac.kr*

<sup>b</sup> *Department of Chemistry, Pusan National University, Pusan 609-735, Korea.*

S1. Experimental details of **1a** and **1b**

S2. TGA/DSC overlay of **1a** and **1b**

S3. FT-IR spectra of **1a** and **1b** in KBr

S4. <sup>1</sup>H NMR spectrum of **1a** and **1b** in CDCl<sub>3</sub>/CD<sub>3</sub>OD

S5. <sup>13</sup>C NMR spectrum of **1a** and **1b** in CDCl<sub>3</sub>/CD<sub>3</sub>OD

S6. <sup>31</sup>P NMR spectrum of **1a** and **1b** in CDCl<sub>3</sub>/CD<sub>3</sub>OD

S7. <sup>19</sup>F NMR spectrum of **1a** in CDCl<sub>3</sub>/CD<sub>3</sub>OD

S8. Emission spectra of **1a** and **1b** in solid state at RT

S9. Emission spectra of **1a** and **1b** in solid state at 77 K

S10. Time-dependent emission spectra of **1a** in CF<sub>3</sub>CO<sub>2</sub>H and NEt<sub>3</sub> chamber at RT

S11. Time-dependent emission spectra of **1a** in HCl and NEt<sub>3</sub> chamber at RT

## S1. Experimental details of 1a and 1b

**Materials and Instrumentation:**  $\text{Au}_2(\text{dppp})\text{Cl}_2$  were prepared according to the literature procedure. 2-benzimidazolethiol (BIT) was purchased from Aldrich and was used without further purification. Elemental analyses were performed on crystalline samples by using a Vario-EL analyzer at Center for University-Wide Research Facilities, CBNU. Infrared spectra were obtained with a Thermo Nicolet AVATAR 330 FT-IR spectrophotometer as KBr pellets.  $^1\text{H}$  NMR (400 MHz) and  $^{13}\text{C}$  NMR (100 MHz) spectra were recorded with a JEOL JNM AL-400 instrument relative to  $\text{SiMe}_4$ .  $^{19}\text{F}$  NMR (376 MHz) and  $^{31}\text{P}$  NMR (162 MHz) spectra were reported relative to external  $\text{CF}_3\text{CO}_2\text{H}$  (100%) and  $\text{H}_3\text{PO}_4$  (85%), respectively, with a JEOL JNM AL-400 spectrometer. Emission spectra were obtained using a JASCO FP-6500 spectrofluorometer corrected for instrument response with monochromators positioned with a 2 nm band-pass. Solid-state emission samples were prepared as a 10% (w/w) mixture of the complex in a matrix of finely ground KBr. The melting points were determined with a SRS EZ-Melt MPA-120 melting point apparatus and were uncorrected. Thermal analyses were carried out under a dinitrogen atmosphere at a scan rate of 10 °C/min using a TA Instruments SDT Q20 and DSC Q20.

**$\text{Au}_2(\text{dppp})(\text{BIT})_2 \cdot 2\text{CF}_3\text{CO}_2\text{H}$  (1a):** To a solution of  $\text{Au}_2(\text{dppp})\text{Cl}_2$  (310 mg, 0.35 mmol) in  $\text{CH}_2\text{Cl}_2$  (15 mL) was added  $\text{AgCF}_3\text{CO}_2$  (156 mg, 0.71 mmol), and the reaction mixture was stirred at RT for 30 min. The suspension was filtered through a pad of celite to remove the  $\text{AgCl}$  precipitate, and into a suspension of 2-benzimidazolethiol (BIT) (106 mg, 0.71 mmol) in  $\text{CH}_2\text{Cl}_2$  (15 mL). The reaction mixture was stirred 2 h at RT. The resulting solution was concentrated to 5 mL, and the addition of  $\text{Et}_2\text{O}$  (75 mL) gave an off-white precipitate. The precipitate was collected by filtration and washed with  $\text{Et}_2\text{O}$ . Recrystallization by slow diffusion of  $\text{Et}_2\text{O}$  into a  $\text{CH}_2\text{Cl}_2$  solution gave a white colored product. Yield 76%. Mp 197.6 °C. Anal. Calcd for  $\text{C}_{41}\text{H}_{36}\text{N}_4\text{P}_2\text{S}_2\text{Au}_2 \cdot 2\text{CF}_3\text{CO}_2\text{H}$ : C, 40.55; H, 2.87; N, 4.20; S, 4.81. Found: C, 40.91; H, 3.03; N, 4.56; S, 5.88. IR (KBr):  $\nu = 1201(\text{s}), 1460(\text{m}), 1661(\text{s}) \text{ cm}^{-1}$  ( $\text{C}=\text{O}$ ).  $^1\text{H}$  NMR (400 MHz,  $\text{CDCl}_3/\text{CD}_3\text{OD}$ , 25 °C, TMS):  $\delta = 7.57$  (dd,  $J=12.7, 6.8$  Hz, 8H), 7.38 (d,  $J=5.9$  Hz, 12H), 7.13 (dd,  $J=6.1, 3.2$  Hz, 4H), 6.95 (dd,  $J=6.1, 3.2$  Hz, 4H), 2.79 (br, 4H), 2.08 (br, 2H).  $^{13}\text{C}$  NMR (100 MHz,  $\text{CDCl}_3/\text{CD}_3\text{OD}$ , 25 °C, TMS):  $\delta = 20.4, 27.2, 27.6, 111.5, 115.1, 118.1, 123.8, 127.7, 128.2, 129.0, 129.1, 131.8, 131.9, 132.7, 132.8, 156.5,$

161.1, 161.5, 161.8.  $^{19}\text{F}$  NMR (376 MHz,  $\text{CDCl}_3/\text{CD}_3\text{OD}$ , 25 °C,  $\text{CF}_3\text{CO}_2\text{H}$ ):  $\delta = -75.5$ .  $^{31}\text{P}$  NMR (162 MHz,  $\text{CDCl}_3/\text{CD}_3\text{OD}$ , 25 °C,  $\text{PCl}_3$ ):  $\delta = 32.3$ .

**$\text{Au}_2(\text{dppp})(\text{BIT})_2 \cdot 2.5\text{CH}_3\text{OH} \cdot 0.5\text{H}_2\text{O}$  (1b): Method A** This compound was prepared by the similar method as for **1a**, except for using basic reaction condition. To a solution of  $[\text{Au}_2(\text{dppp})(\text{CF}_3\text{CO}_2)_2]$  in  $\text{CH}_2\text{Cl}_2$  was added excess  $\text{K}_2\text{CO}_3$  and two equivalent BIT at once, and the resulting suspensions were then stirred 12 h at RT. After excess  $\text{K}_2\text{CO}_3$  and other precipitate were filtered off, the filtrate was evaporated to dryness. The crude white solid was recrystallized from a solvent pair of  $\text{CH}_2\text{Cl}_2$  and hexane (10:1) to obtain colorless crystals. Yield 88%. **Method B** To a solution of  $[\text{Au}_2(\text{dppp})(\text{CF}_3\text{CO}_2)_2]$  in  $\text{CH}_2\text{Cl}_2$  was added two equivalent  $\text{K}(\text{BIT}) \cdot \text{H}_2\text{O}$  in methanol, and the resulting solution was then stirred 2 h at RT. After  $\text{KCF}_3\text{CO}_2$  was filtered off, the filtrate was evaporated to dryness. The crude white solid was recrystallized from a solvent pair of  $\text{CH}_2\text{Cl}_2$  and hexane to obtain colorless crystals. Yield 85%. Mp 280.7 °C. Anal. Calcd for  $\text{C}_{41}\text{H}_{36}\text{N}_4\text{P}_2\text{S}_2\text{Au}_2 \cdot 2.5\text{CH}_3\text{OH} \cdot 0.5\text{H}_2\text{O}$ : C, 43.76; H, 3.97; N, 4.69; S, 5.37. Found: C, 44.18; H, 3.44; N, 5.04; S, 6.27. IR (KBr):  $\nu = 1431$  (m)  $\text{cm}^{-1}$ .  $^1\text{H}$  NMR (400 MHz,  $\text{CDCl}_3/\text{CD}_3\text{OD}$ , 25 °C, TMS):  $\delta = 7.32$  (t,  $J = 10.2$  Hz, 9H), 7.14 (d,  $J = 7.3$  Hz, 5H), 7.09 (d,  $J = 7.3$  Hz, 9H), 7.01 (s, 4H), 6.78 (s, 4H), 2.53 (br, 4H), 1.80 (br, 2H).  $^{13}\text{C}$  NMR (100 MHz,  $\text{CDCl}_3/\text{CD}_3\text{OD}$ , 25 °C, TMS):  $\delta = 121.3, 128.4, 129.0, 129.2, 131.7, 132.8, 132.9$ .  $^{31}\text{P}$  NMR (162 MHz,  $\text{CDCl}_3/\text{CD}_3\text{OD}$ , 25 °C,  $\text{PCl}_3$ ):  $\delta = 33.6$ .

S2. TGA/DSC overlay of 1a (top) and 1b (down)

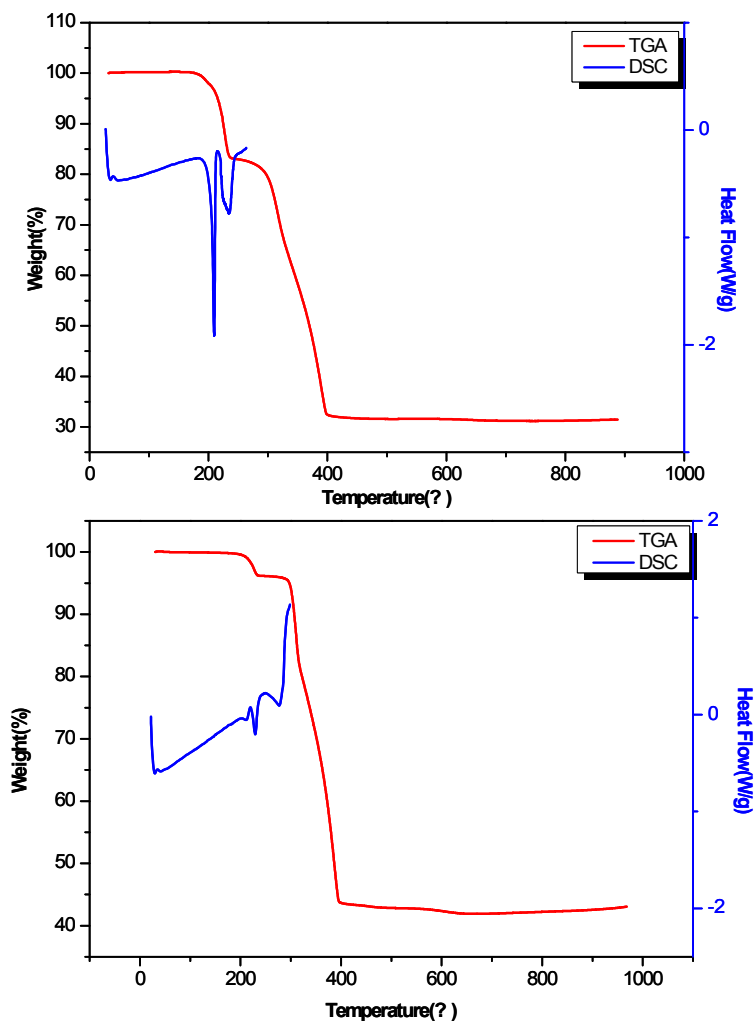

S3. FT-IR spectra of 1a (top) and 1b (down) in KBr

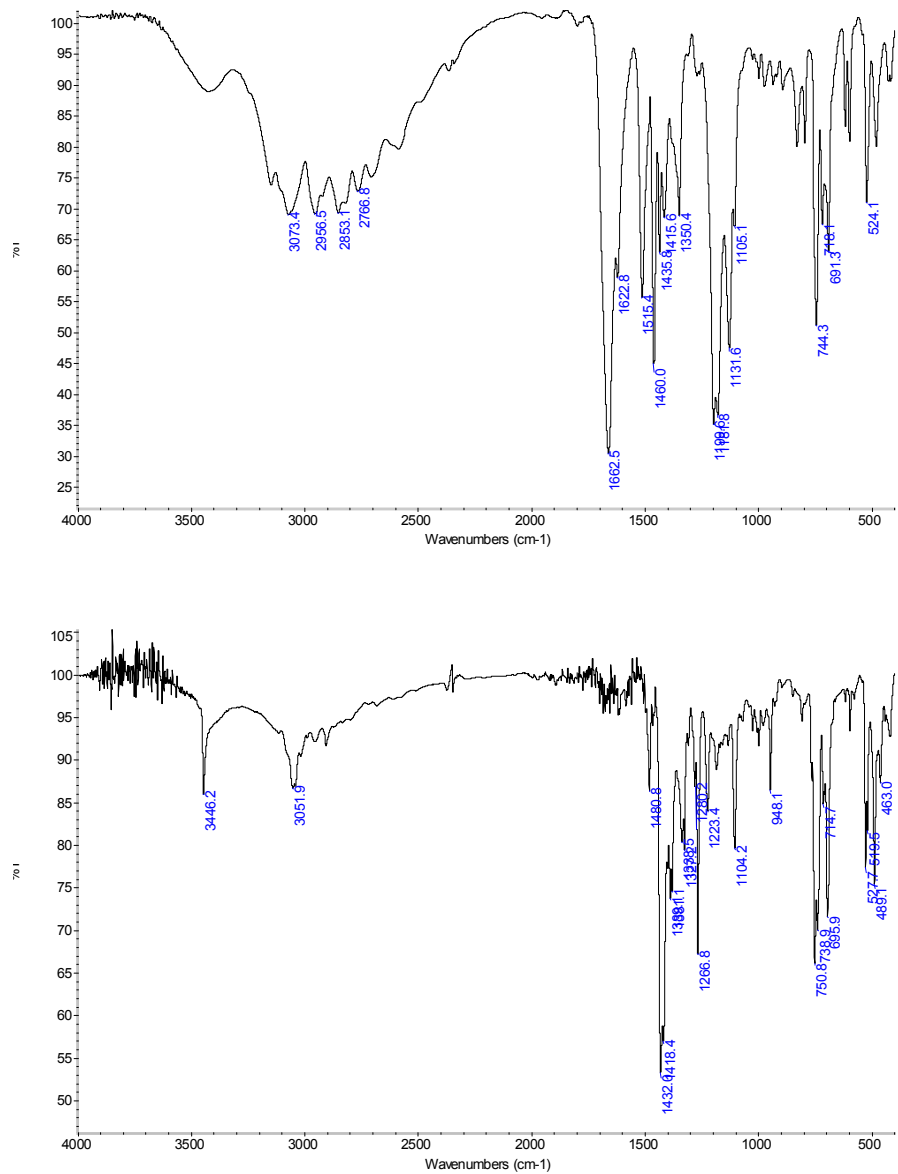

**S4.  $^1\text{H}$  NMR spectrum of 1a (top) and 1b (down) in  $\text{CDCl}_3/\text{CD}_3\text{OD}$**

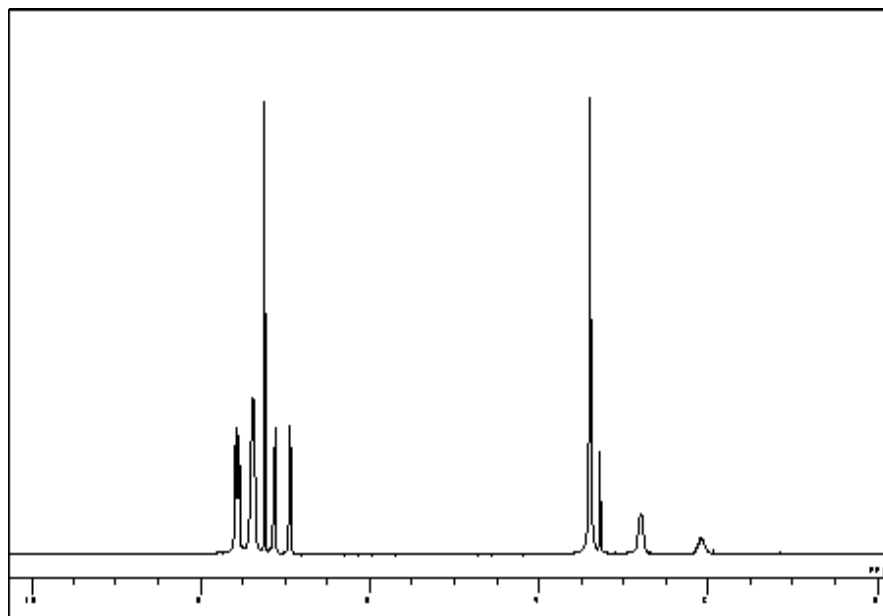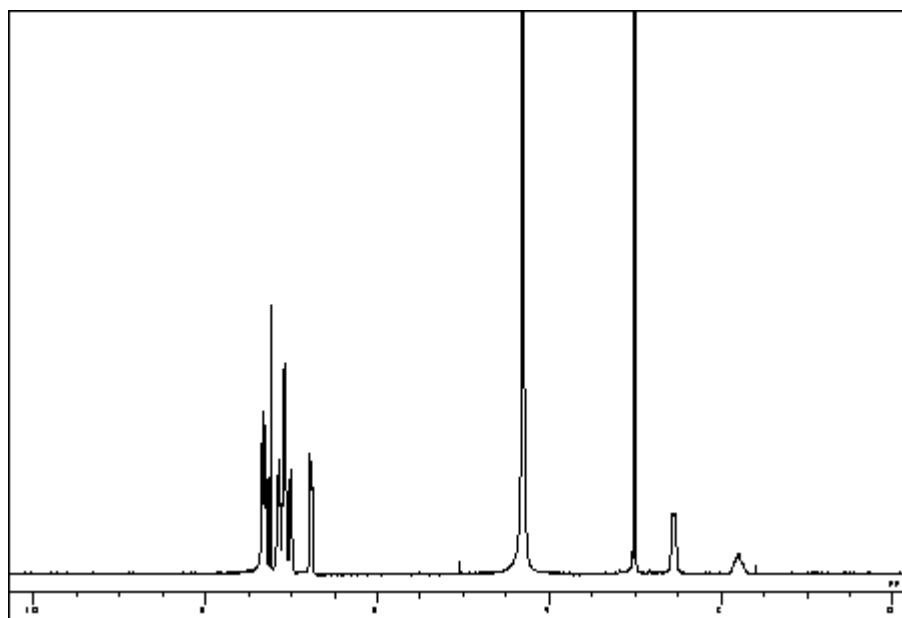

**S5.  $^{13}\text{C}$  NMR spectrum of 1a (top) and 1b (down) in  $\text{CDCl}_3/\text{CD}_3\text{OD}$**

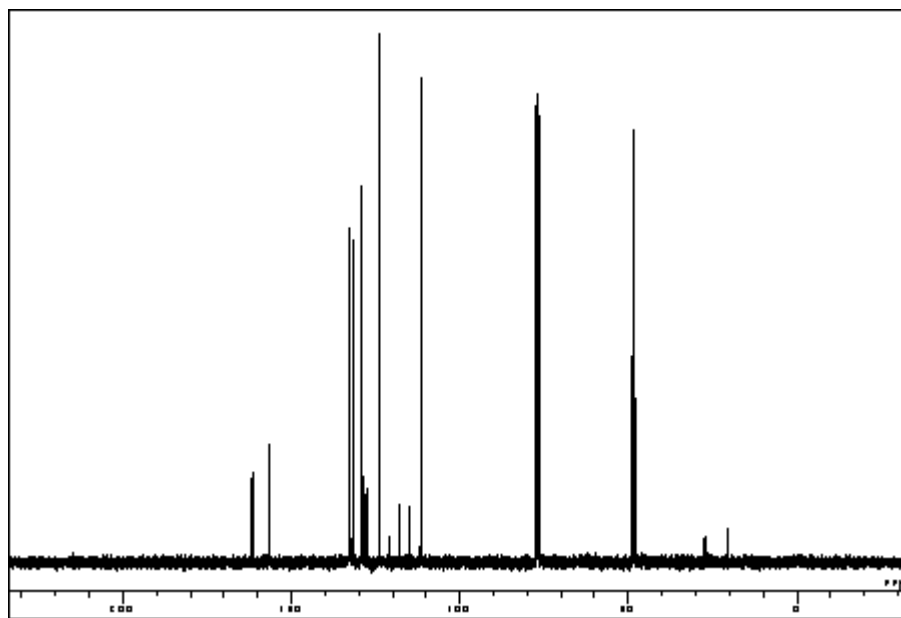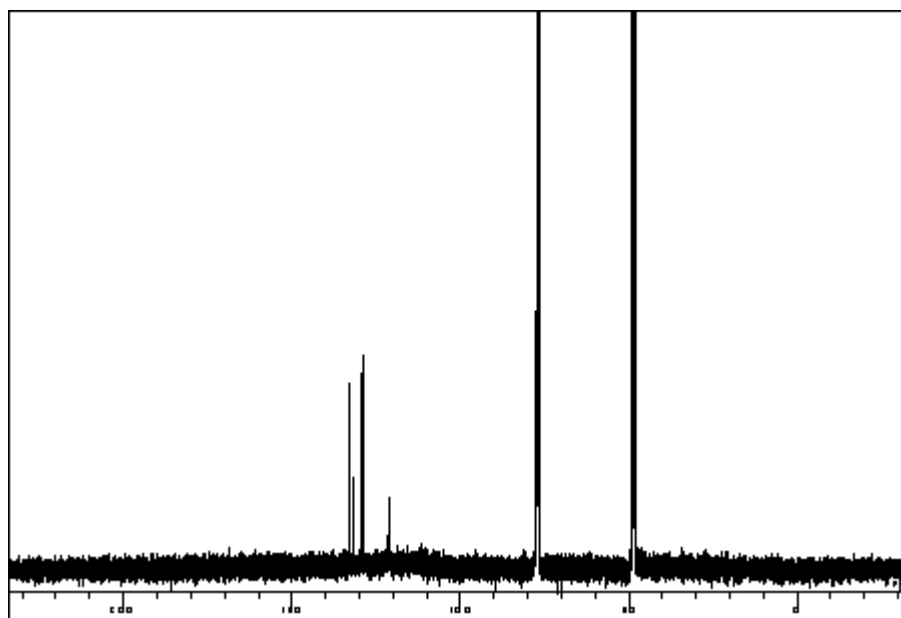

S6.  $^{31}\text{P}$  NMR spectrum of 1a (top) and 1b (down) in  $\text{CDCl}_3/\text{CD}_3\text{OD}$

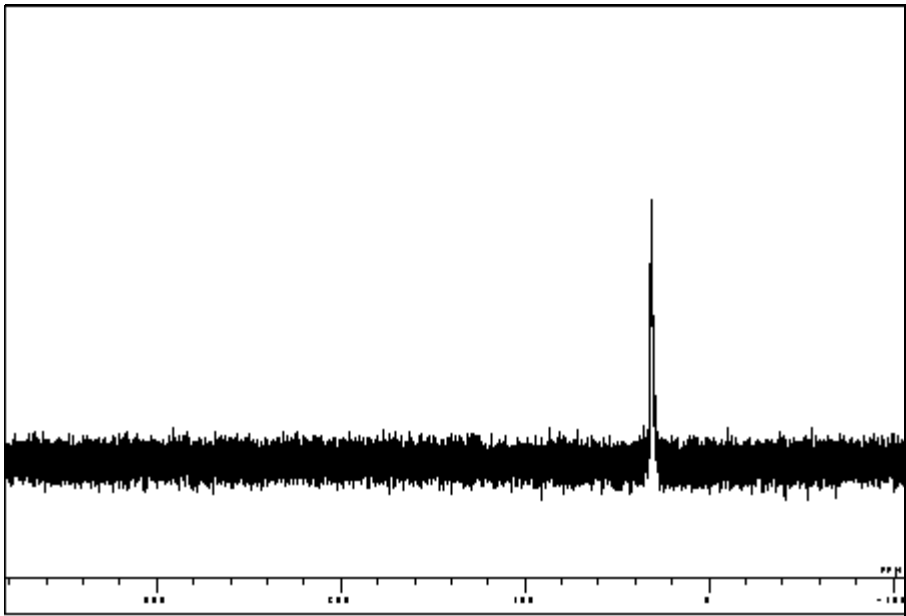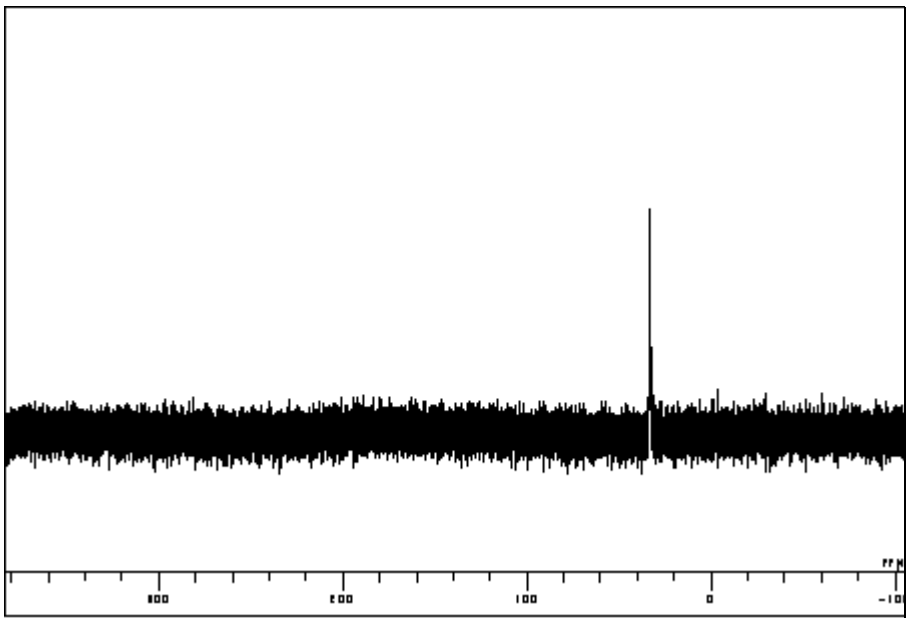



S7. <sup>19</sup>F NMR spectrum of 1a in CDCl<sub>3</sub>/CD<sub>3</sub>OD

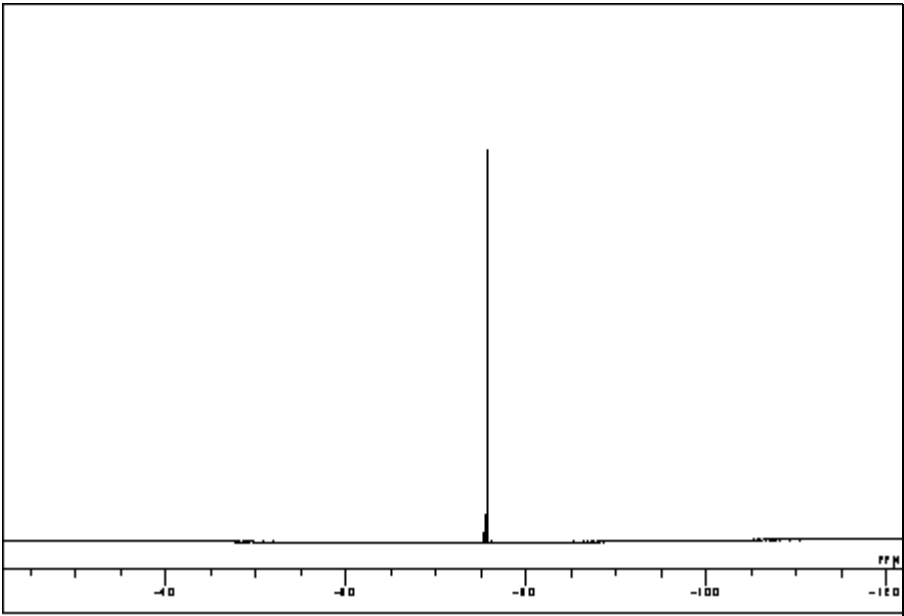

### S8. Emission spectra of 1a and 1b in solid state at RT

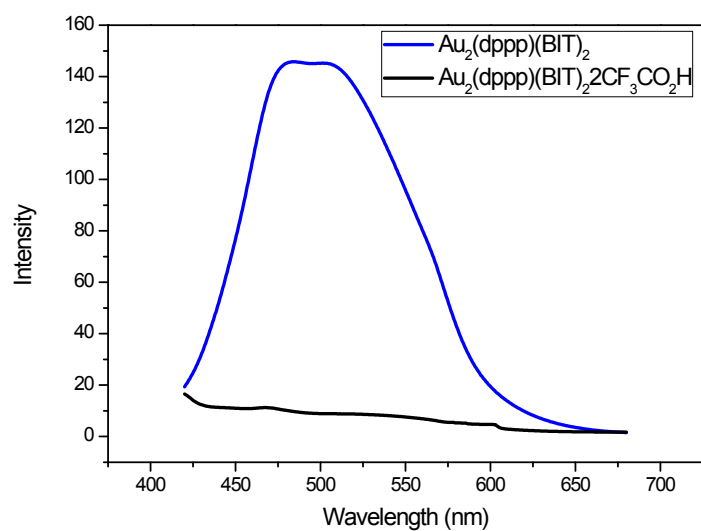

### S9. Emission spectra of 1a and 1b in solid state at 77K

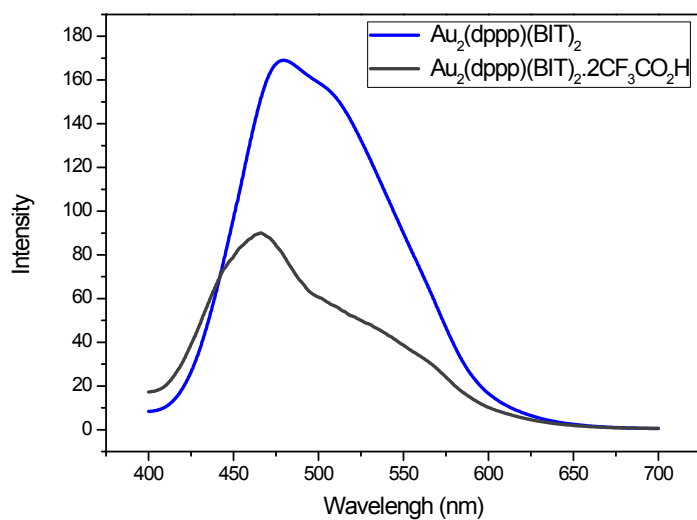

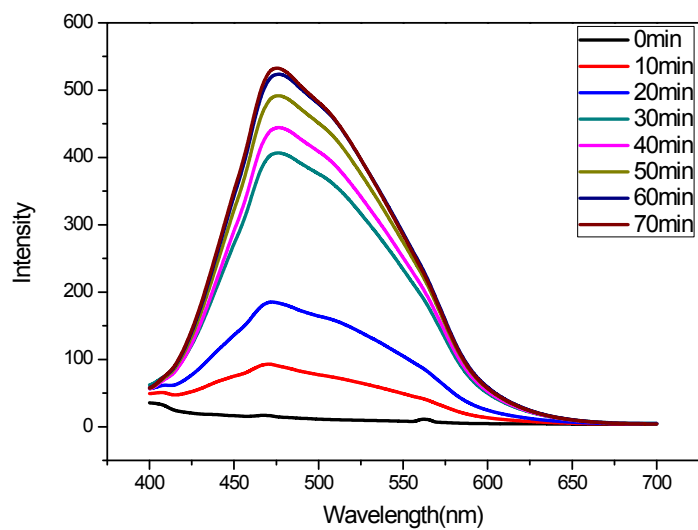

**S11. Time-dependent emission spectra of 1a in HCl (top) and NEt<sub>3</sub> (down) chamber at RT**

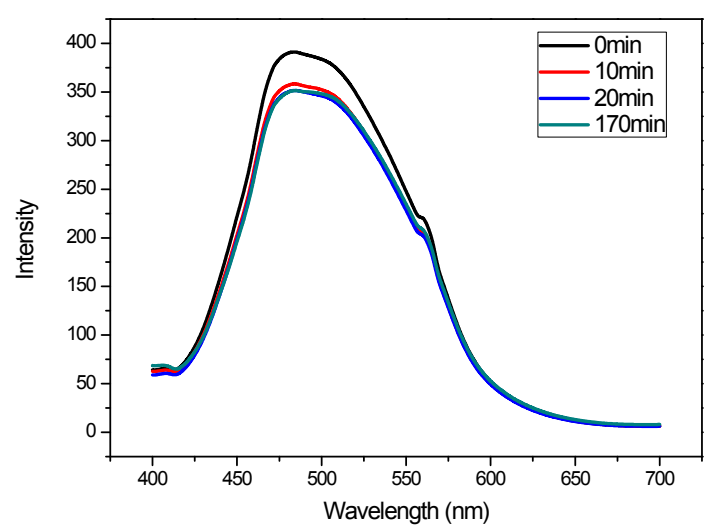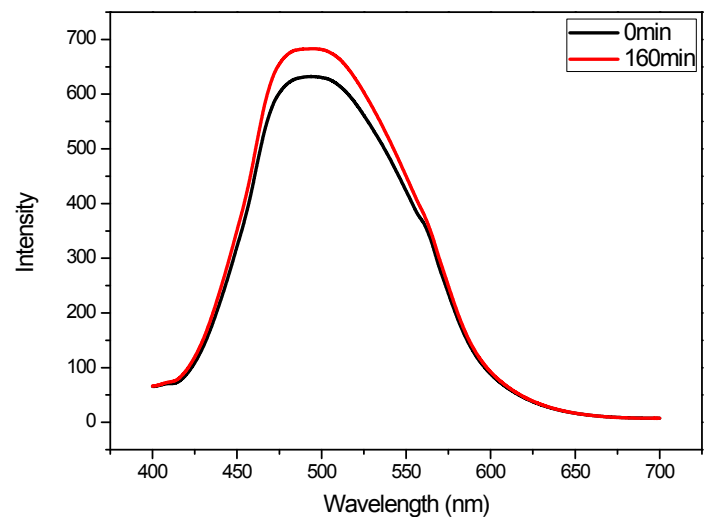

Supplement: c1cc14351d.pdf [file c1cc14351d.pdf]
